# Supplementary material for: Simultaneous Inhibition of BCR-ABL1 Tyrosine Kinase and PAK1/2 Serine/Threonine Kinase Exerts Synergistic Effect against Chronic Myeloid Leukemia Cells
Source: MDPI journal article supplement (doi:10.3390/cancers11101544), 2019-10-12
Supplement: s1 [file s1]

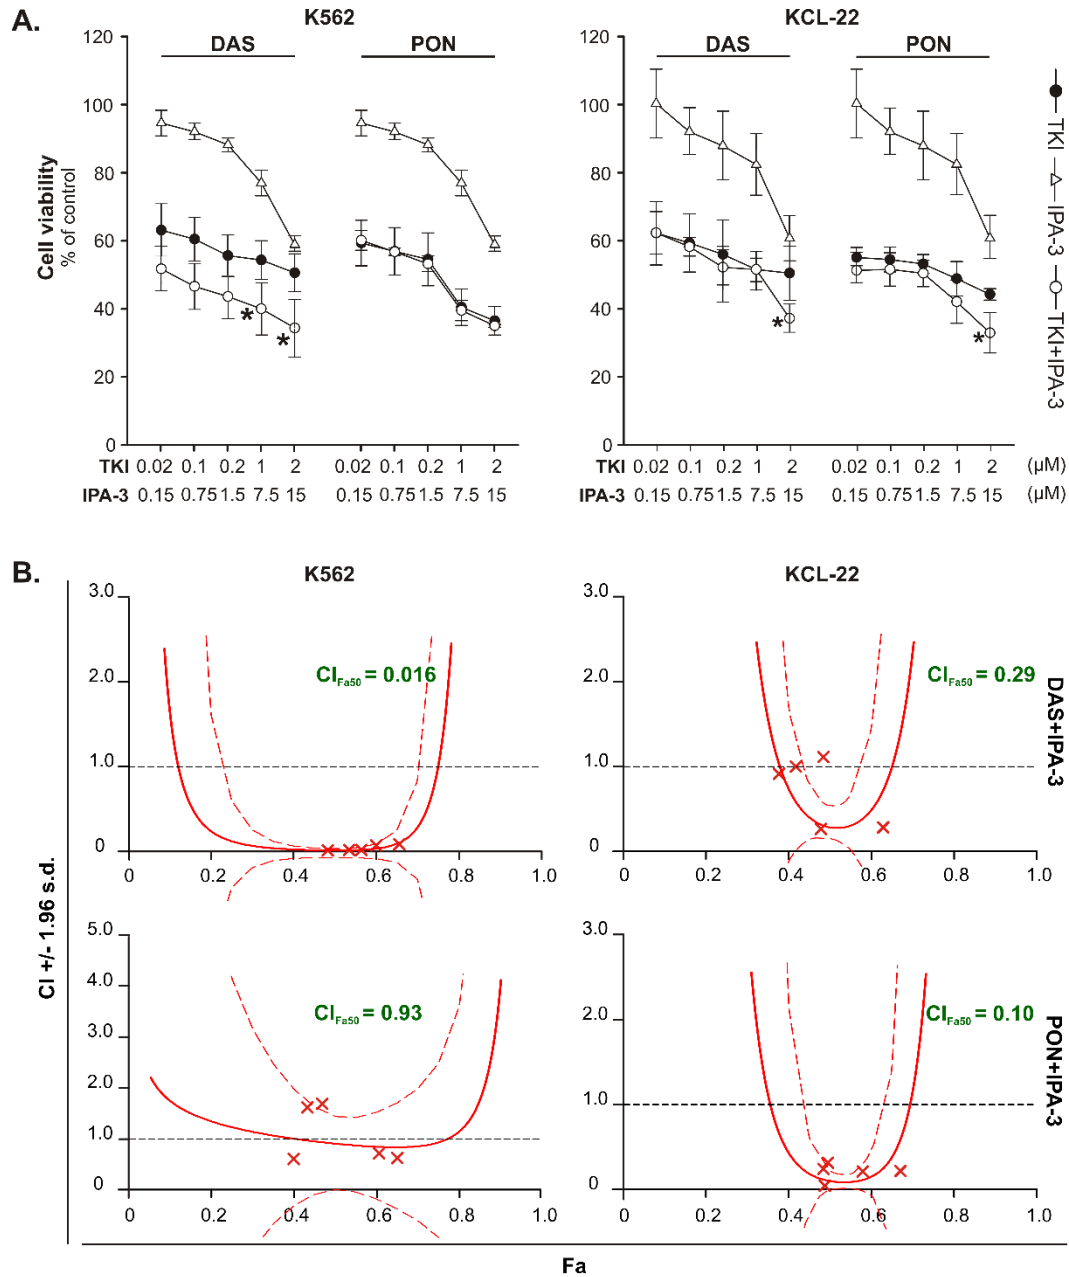

**Figure S2.** Effect of dasatinib (DAS), ponatinib (PON) and IPA-3 on cell viability of CML-BP cell lines. (A) The cells were treated for 24 h with the indicated doses of TKIs and IPA-3 individually and in combination followed by MTT assay to test cell viability. Each point represents the mean  $\pm$  standard deviation (SD) ( $n \geq 4$ ), \*  $p < 0.05$  in comparison with TKI. (B) Combination index (CI) values with a 95% confidence interval at all effective levels indicate the nature of the interactions (CI = 1 = additivity, CI < 1 = synergy, CI > 1 = antagonism). Fa is the fraction of cells affected by combination treatment.
