# Supplementary material for: Simultaneous Inhibition of BCR-ABL1 Tyrosine Kinase and PAK1/2 Serine/Threonine Kinase Exerts Synergistic Effect against Chronic Myeloid Leukemia Cells
Source: MDPI journal article supplement (doi:10.3390/cancers11101544), 2019-10-12

**Figure S3.** Row Western blots for Figures 2 and 4. The order of the samples are the same as on the Figures 2 and 4.

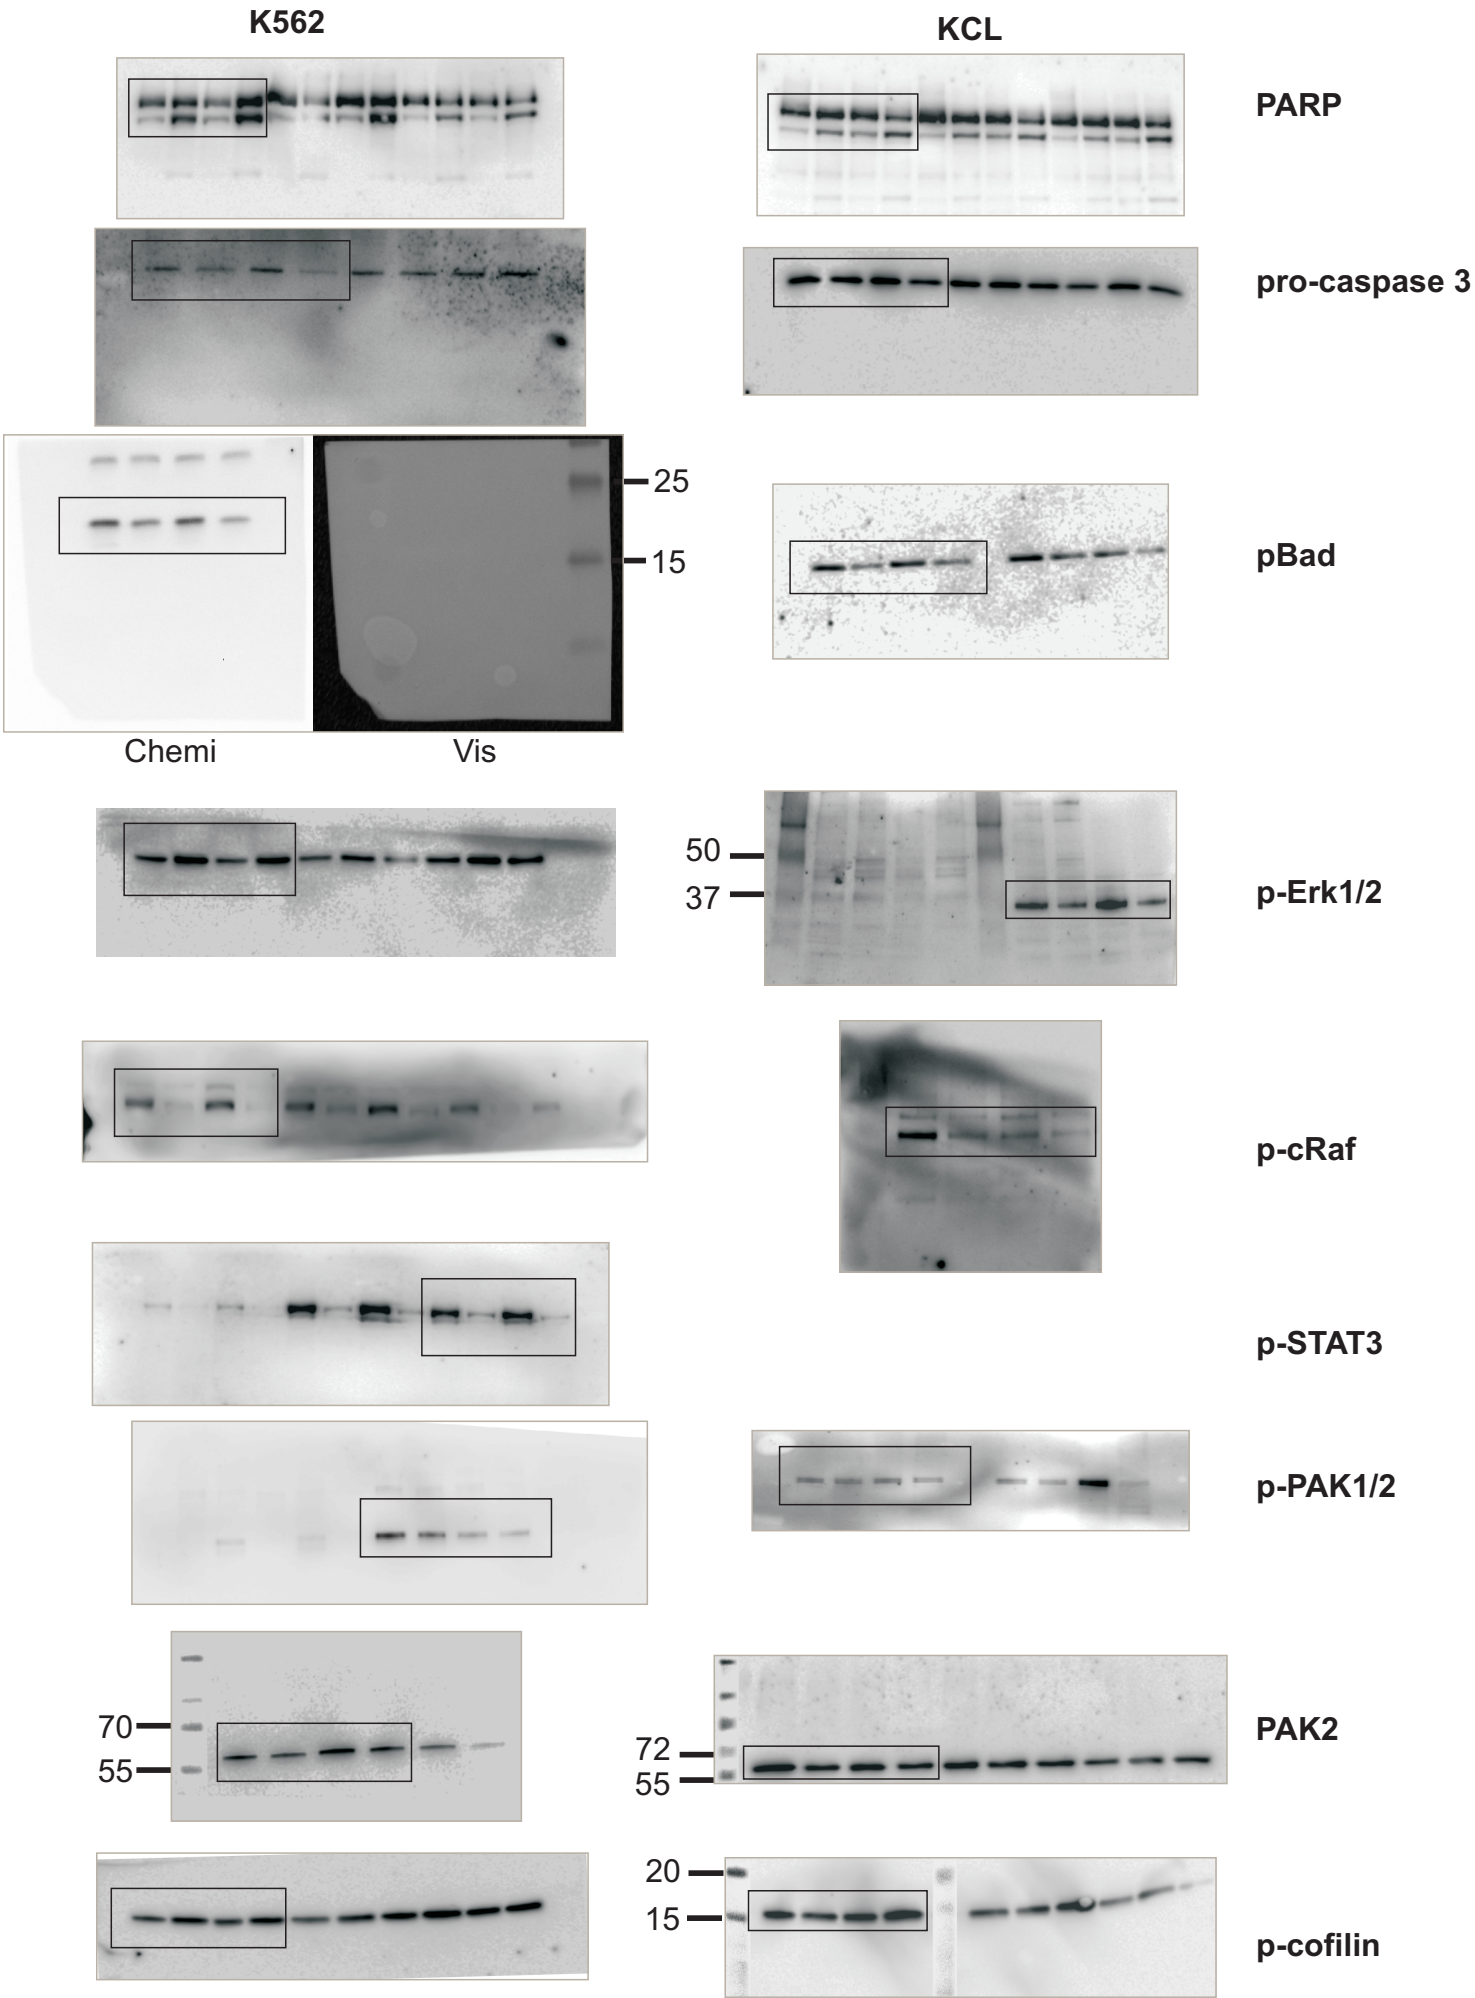

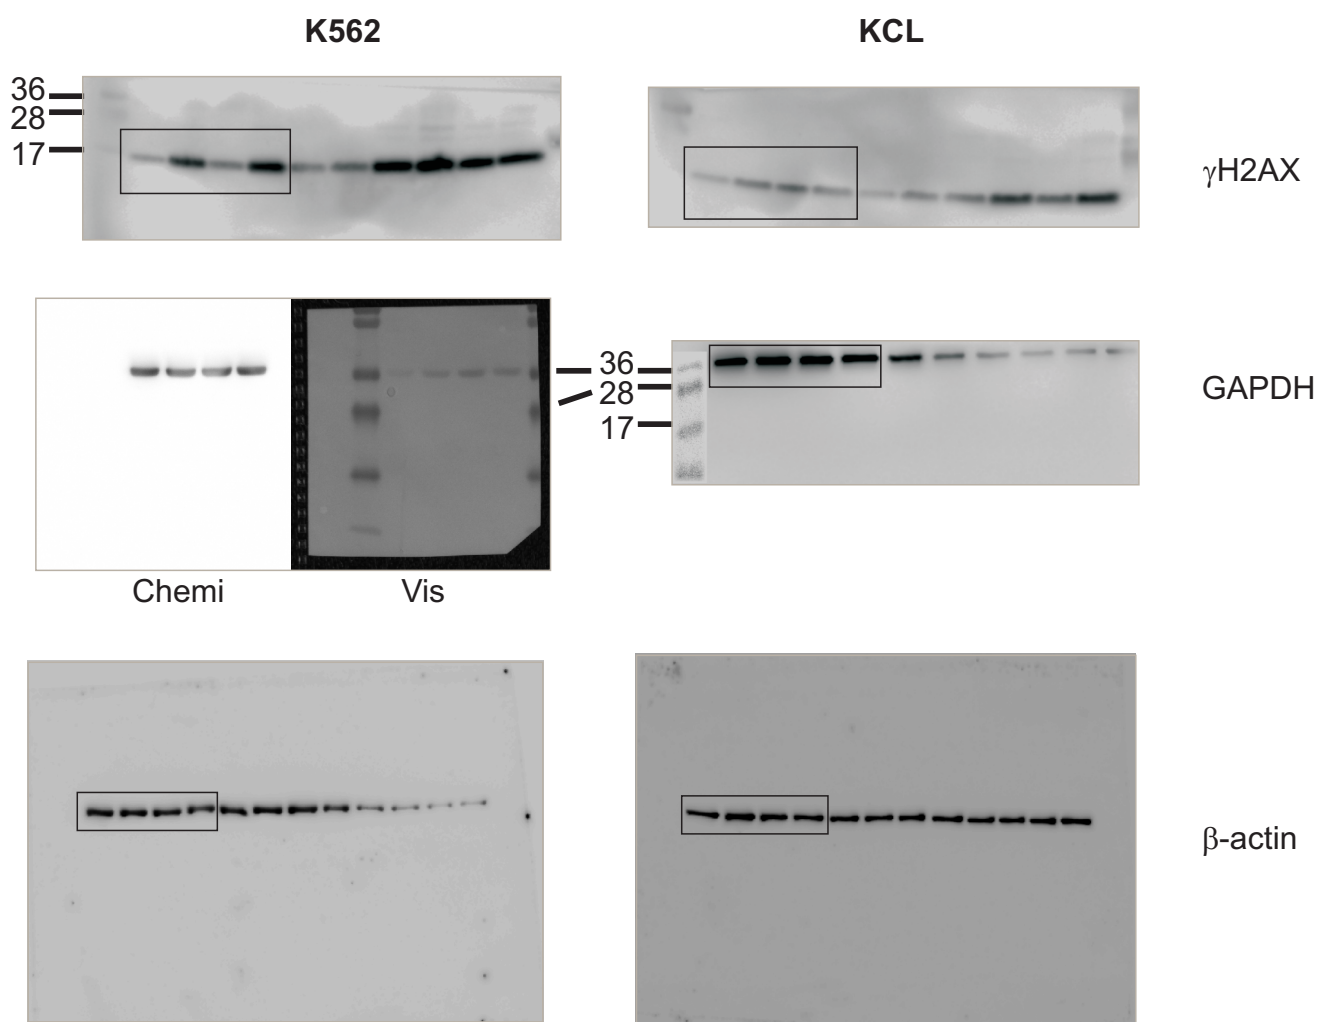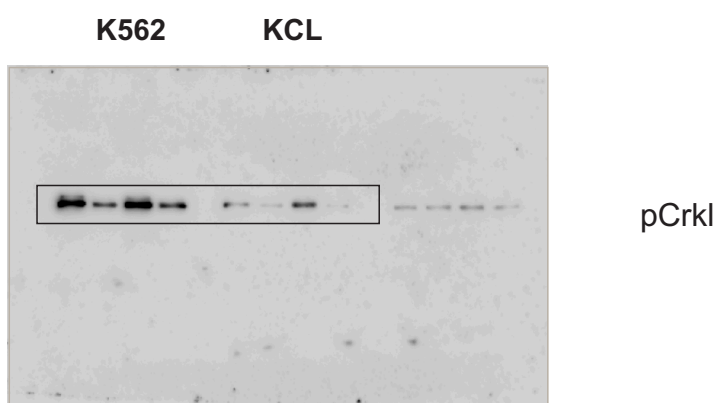

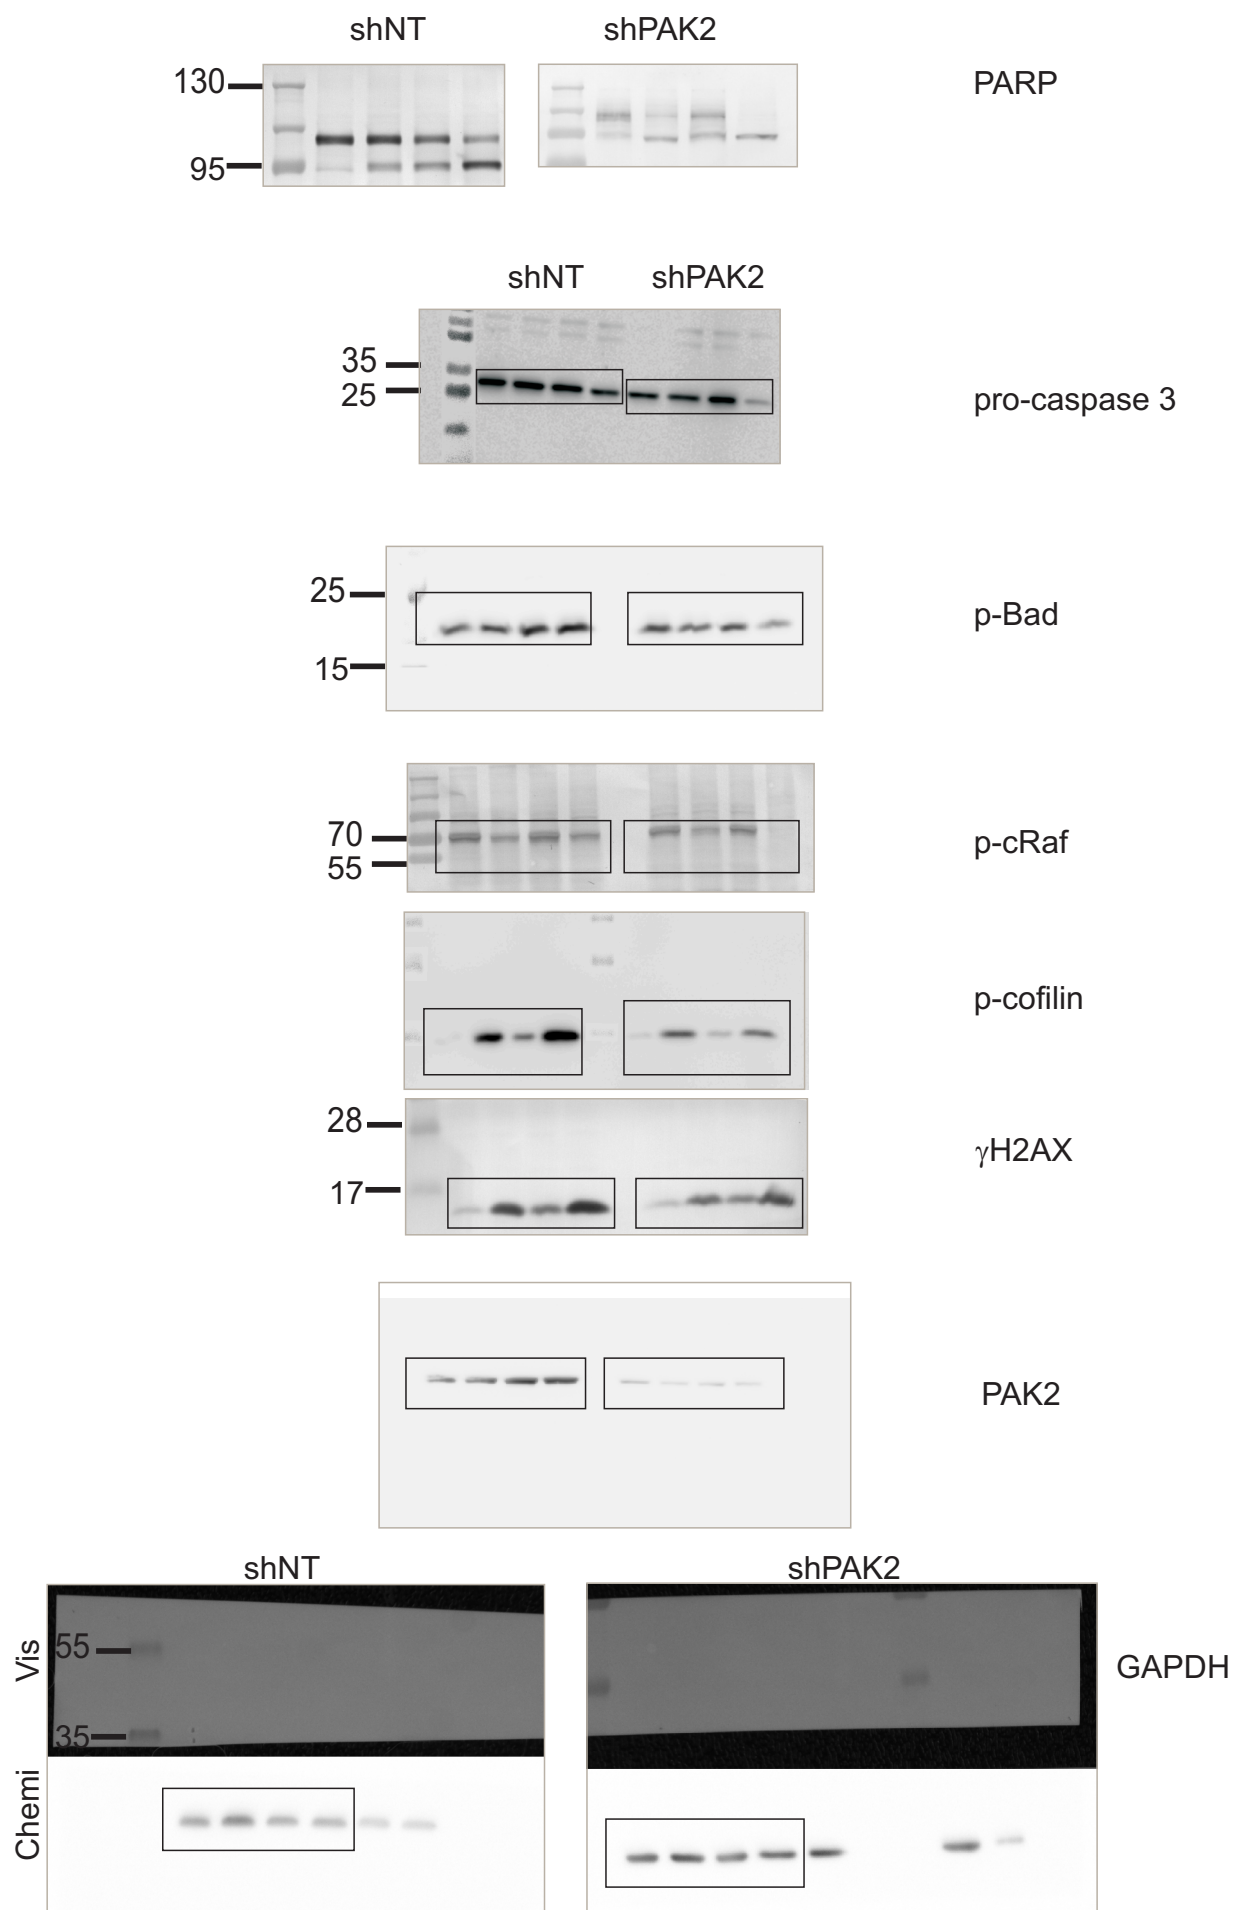

Supplement: s1 [file s1]
