# Supplementary material for: Simultaneous Inhibition of BCR-ABL1 Tyrosine Kinase and PAK1/2 Serine/Threonine Kinase Exerts Synergistic Effect against Chronic Myeloid Leukemia Cells
Source: MDPI journal article supplement (doi:10.3390/cancers11101544), 2019-10-12
Supplement: s1 [file s1]

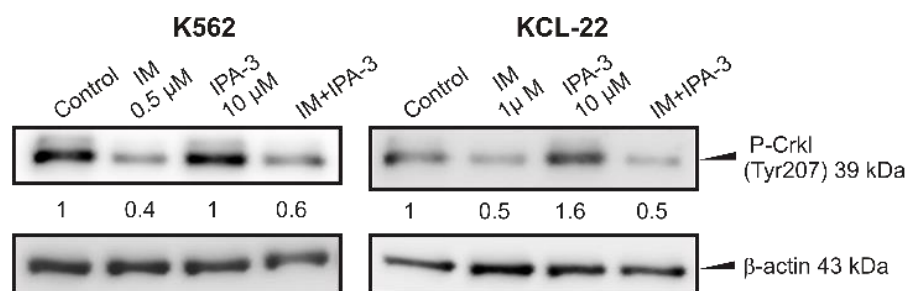

**Figure S1.** The level of pCrkl in K562 and KCL-22 cells treated by imatinib (IM) or/and IPA-3, respectively. Western blots of total lysates, β-actin was used as a loading control.
